## **Correction: Hypermethylation of the CHRDL1 promoter induces proliferation and metastasis by activating Akt and Erk in gastric cancer**

**Yao-fei Pei, Ya-jing Zhang, Yao Lei, Ding-wei Wu, Tong-hui Ma and Xi-qiang Liu**

Copyright: Pei et al. This is an open-access article distributed under the terms of the Creative Commons Attribution License 3.0 (CC BY 3.0), which permits unrestricted use, distribution, and reproduction in any medium, provided the original author and source are credited.

**Present:** The 4th author's name, 'Ding-wei Wu,' is spelled incorrectly.

**Correct:** The proper spelling is 'Wei-ding Wu'.

Original article: Oncotarget. 2017; 8:23155-23166. <https://doi.org/10.18632/oncotarget.15513>
